# Supplementary material
Source: Royal Society of Chemistry journal article supplement (doi:10.1039/d6gc00484a)
Supplement: d6gc00484a1.pdf [file d6gc00484a1.pdf]

## Supporting Information

### Electrochemical Nitrate-to-Ammonia Conversion over a Broad Concentration Range via a Hollow $\text{Co}_3\text{O}_4/\text{CuO}$ Catalyst

Li Yao,<sup>a,b,#</sup> Shao Ye,<sup>a,#</sup> Zhe Li,<sup>c,#</sup> Mingjie Tuo,<sup>b</sup> Yibin Cui,<sup>c</sup> Zhenbin Wang,<sup>a</sup> Zhenhua Xie,<sup>d</sup> Wenlei Zhu<sup>\*b</sup> and Bo Shen<sup>\*a</sup>

*a Department of Materials Science and Engineering, City University of Hong Kong, Hong Kong, China.*

*b School of Environment, Nanjing University, Nanjing, China.*

*c Nanjing Institute of Environmental Sciences, Ministry of Ecology and Environment, Nanjing, China.*

*d Department of Chemistry, University of Science and Technology of China, Hefei, China.*

\*Correspondence e-mail: boshen@cityu.edu.hk; wenleizhu@nju.edu.cn

#Li Yao, Shao Ye, and Zhe Li contribute equally

## Product analysis methods

The calculation formula for nitrate conversion is as follows:

$$\text{Conversion (\%)} = (C_0 - C_t) / C_0 * 100\% \quad (1)$$

where  $C_0$  is the initial  $\text{NO}_3^-$  concentration (mM), and  $C_t$  is the  $\text{NO}_3^-$  concentration at time  $t$  (mM).

Energy efficiency (EE) was calculated as the ratio of thermodynamic energy output to electrical energy input:

$$EE_{\text{NH}_3} = \frac{(E_{\text{OER}} - E_{\text{NH}_3}^\theta) * FE_{\text{NH}_3}}{E_{\text{OER}} - E_{\text{cathode}}} * 100\% \quad (2)$$

where  $E_{\text{OER}} = 1.23$  V is the equilibrium potential of the oxygen evolution reaction,  $E_{\text{NH}_3}^\theta = 0.29$  V is the thermodynamic potential for  $\text{NO}_3^-$  to  $\text{NH}_3$  conversion in neutral solution<sup>1,2</sup>, and  $E_{\text{cathode}}$  is the applied cathodic potential (vs. RHE). For H-Co<sub>2</sub>Cu1 at -0.8V in 50 mM  $\text{KNO}_3$  electrolyte, this yields  $EE \approx 43.99\%$ .

Energy consumption per mass of ammonia ( $\text{kWh kg}_{\text{NH}_3}^{-1}$ ) was calculated using the following equation:

$$\text{Energy consumption} = \frac{V_{\text{cell}} * n * F}{3.6 * M * FE_{\text{NH}_3}} \quad (3)$$

Where  $V_{\text{cell}}$  is the cell voltage (V),  $n$  is the number of transferred electrons per mole of  $\text{NH}_3$  produced,  $F$  is the Faraday constant (C/mol),  $M = 17$  g  $\text{mol}^{-1}$  is the molar mass of  $\text{NH}_3$ ,  $FE_{\text{NH}_3}$  is faradaic efficiency of ammonia (%).

## Supporting Figures and Tables

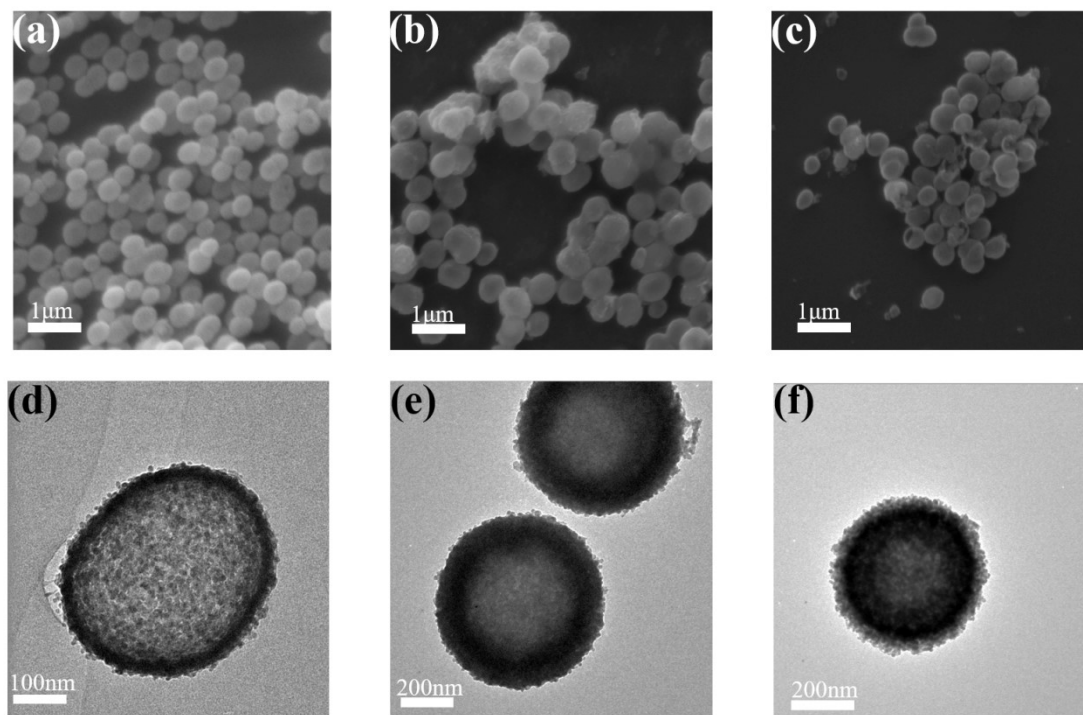

**Fig. S1** SEM images of (a) H-Co<sub>2</sub>Cu<sub>1</sub> (b) H-Co<sub>1</sub>Cu<sub>1</sub> (c) H-Co<sub>1</sub>Cu<sub>2</sub> hollow nanoparticles. TEM images of the (d) H-Co<sub>2</sub>Cu<sub>1</sub> (e) H-Co<sub>1</sub>Cu<sub>1</sub> (f) H-Co<sub>1</sub>Cu<sub>2</sub> hollow nanoparticles.

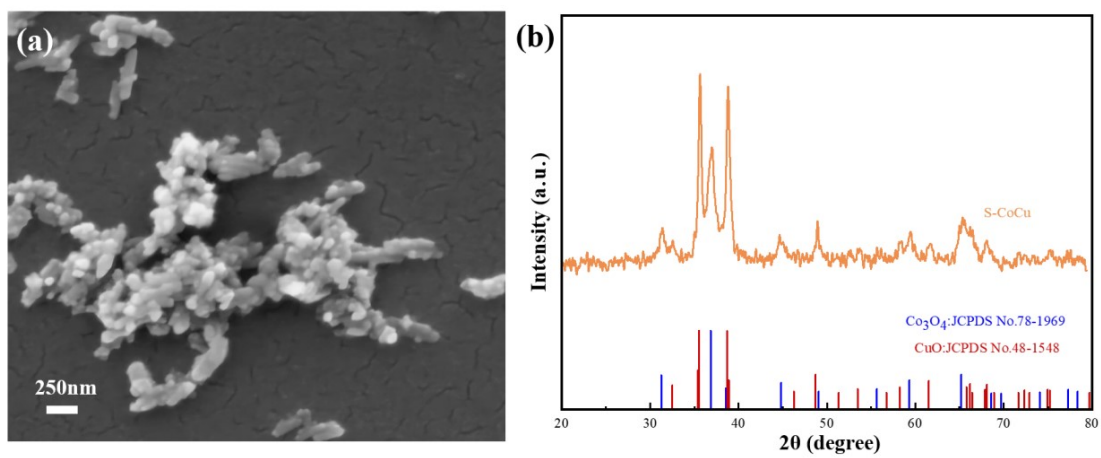

**Fig. S2** (a) a representative SEM image and (b) XRD of S-CoCu particles.

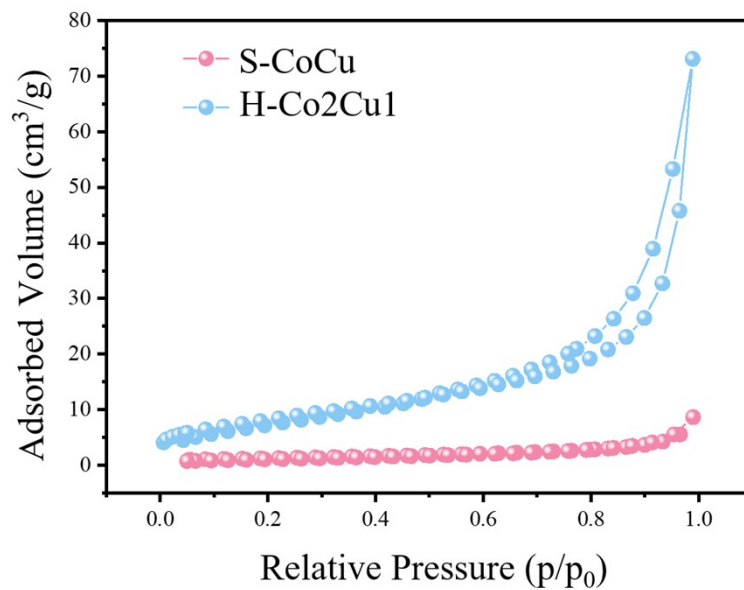

**Fig. S3** Specific surface area measurement of H-Co2Cu1 and S-CoCu. BET surface area of H-Co2Cu1 is 30.3  $\text{m}^2/\text{g}$ , and BET surface area of S-CoCu is 4.5  $\text{m}^2/\text{g}$ .

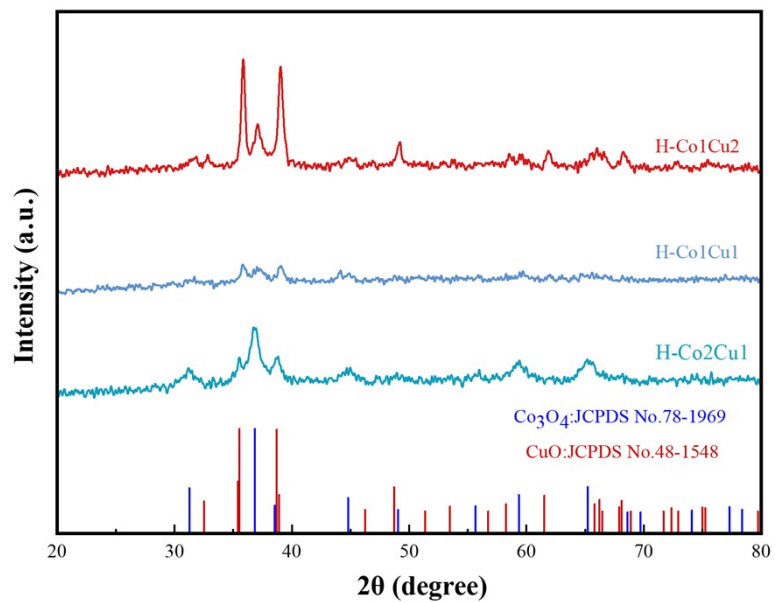

**Fig. S4** XRD patterns of H-Co<sub>2</sub>Cu<sub>1</sub>, H-Co<sub>1</sub>Cu<sub>1</sub> and H-Co<sub>1</sub>Cu<sub>2</sub> hollow spheres.

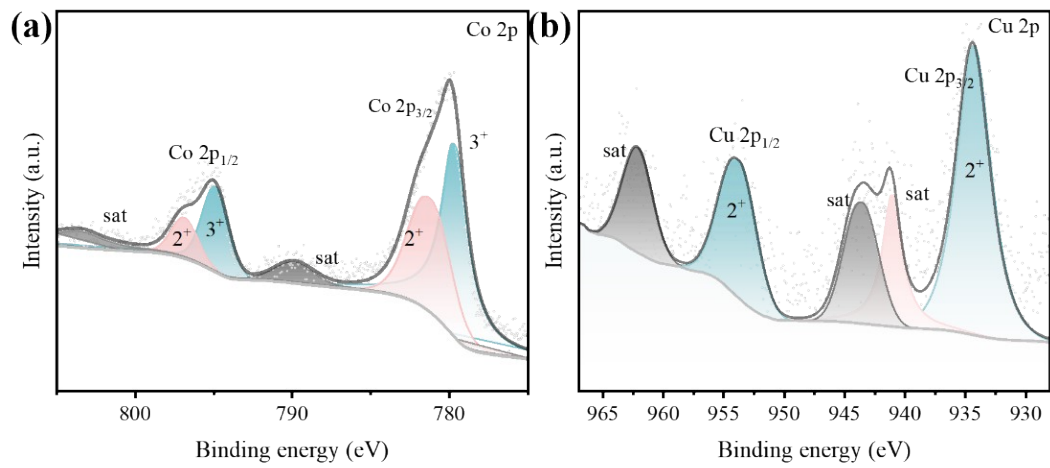

**Fig. S5** XPS spectra of (a) Cu 2p for CuO and (b) Co 2p for Co<sub>3</sub>O<sub>4</sub>.

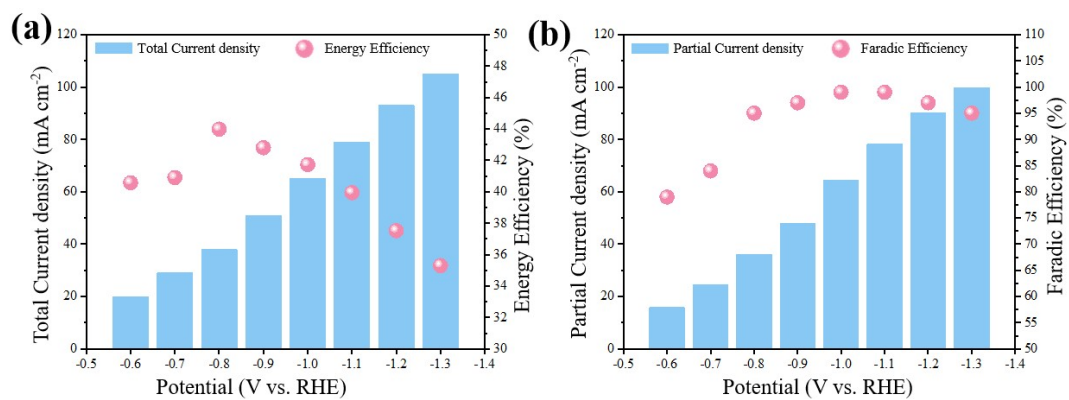

**Fig. S6** (a) Potential-dependent activity and energy efficiency at 50 mM nitrate using H-Co<sub>2</sub>Cu<sub>1</sub>; (b) Potential-dependent NH<sub>3</sub> selectivity and partial current density at 50 mM nitrate using H-Co<sub>2</sub>Cu<sub>1</sub>.

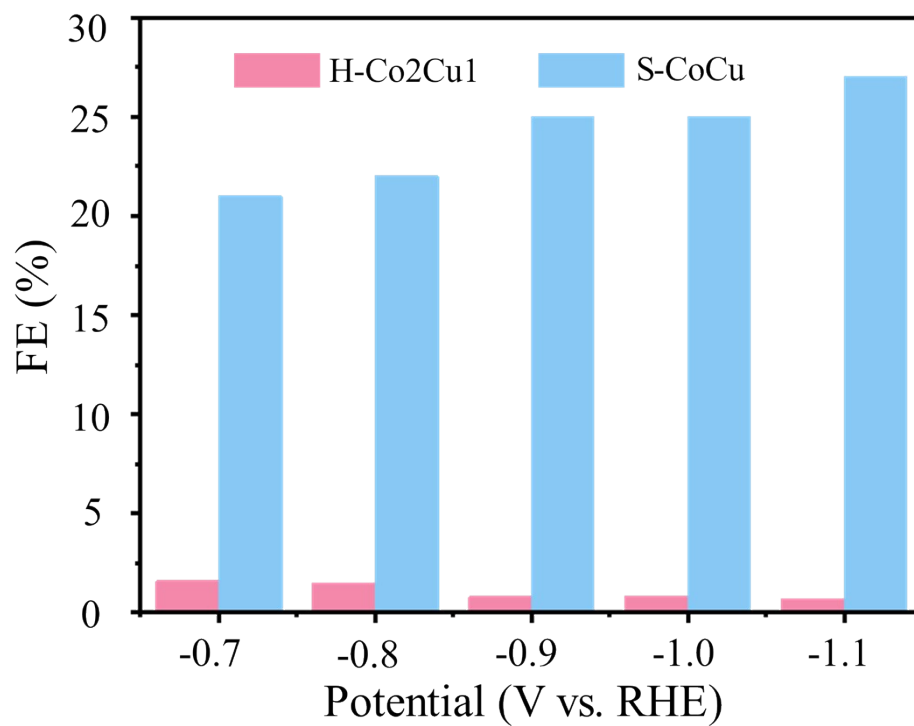

**Fig. S7** Faradaic efficiency of NO<sub>2</sub><sup>-</sup> for H-Co<sub>2</sub>Cu<sub>1</sub> and S-CoCu in 50 mM KNO<sub>3</sub> electrolyte.

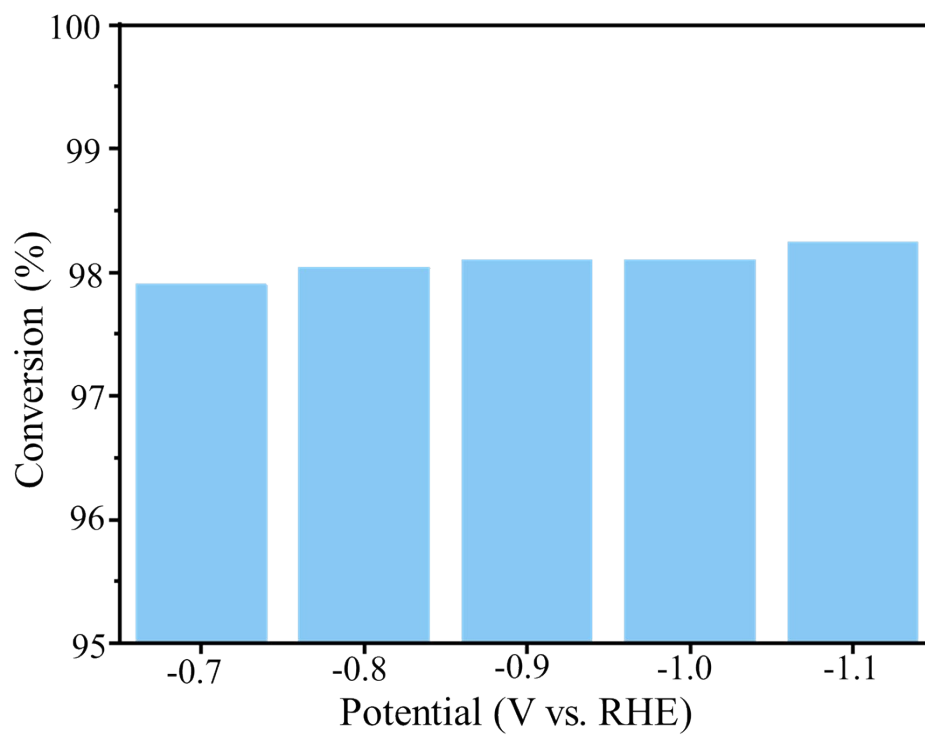

**Fig. S8** NO<sub>3</sub><sup>-</sup> conversion of H-Co<sub>2</sub>Cu<sub>1</sub> in 0.2 M K<sub>2</sub>SO<sub>4</sub> and 50 mM KNO<sub>3</sub> electrolytes.

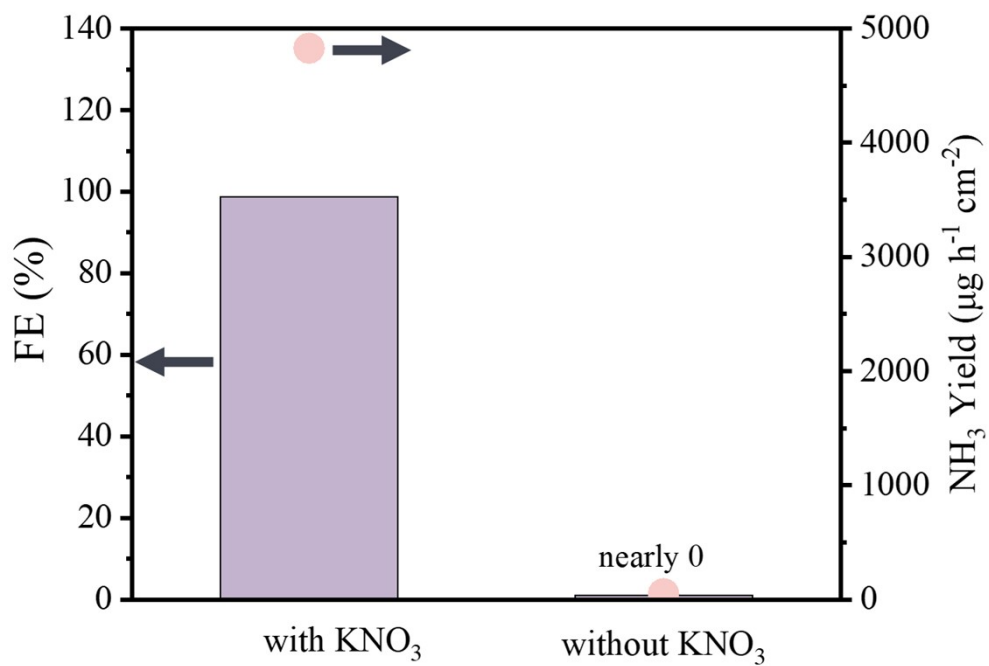

**Fig. S9** The NH<sub>3</sub> yield rate and FE of H-Co<sub>2</sub>Cu<sub>1</sub> measured at -1.1 V in 0.2 M K<sub>2</sub>SO<sub>4</sub> electrolyte with and without NO<sub>3</sub><sup>-</sup> (Bars denote NH<sub>3</sub> FE, and scatter points denote NH<sub>3</sub> yield rate).

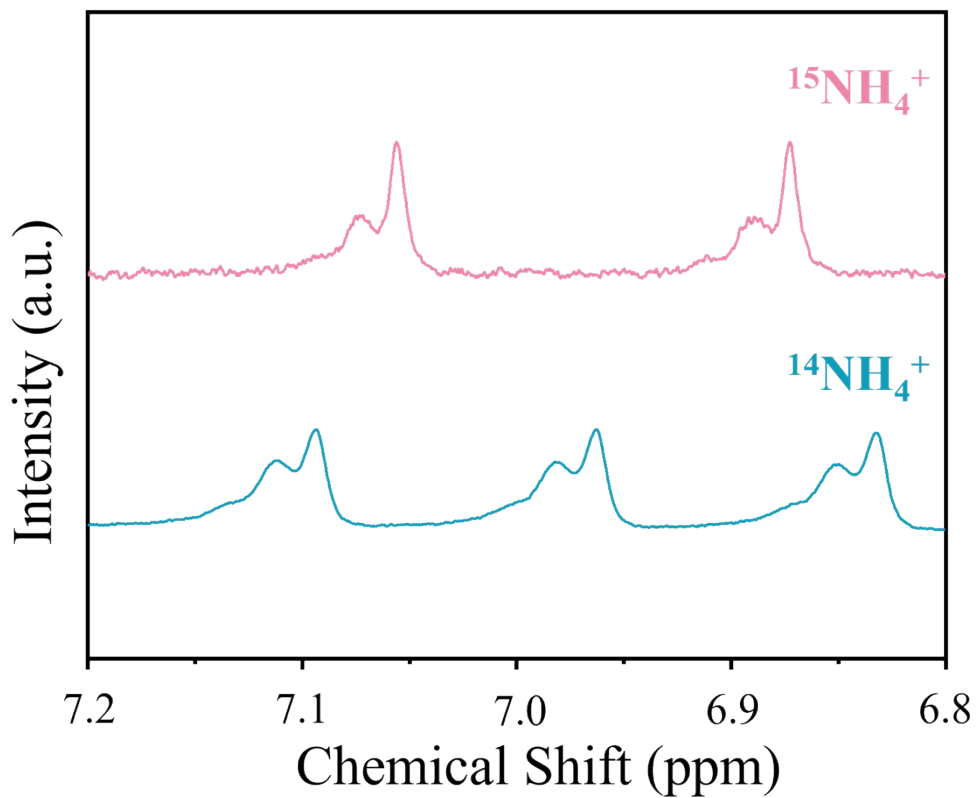

**Fig. S10**  $^1\text{H}$ NMR spectra of the electrolyte after electrocatalytic eNRA reaction using  $^{15}\text{NO}_3^-$  and  $^{14}\text{NO}_3^-$  as the nitrogen source.

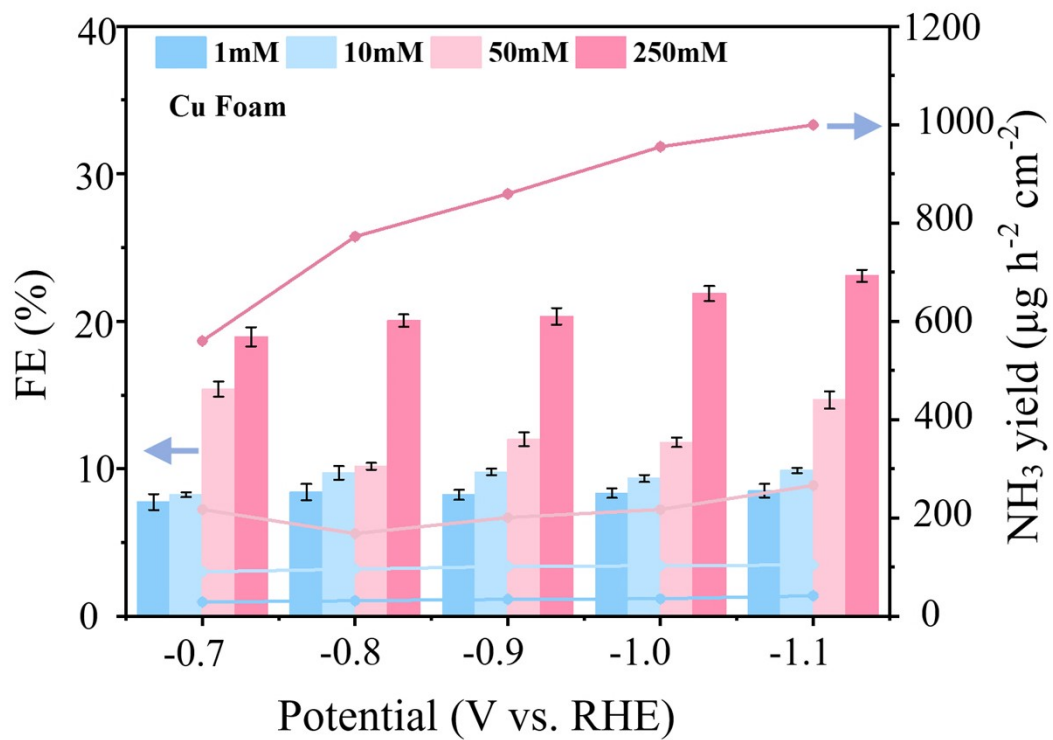

**Fig. S11** Faradaic efficiency for NH<sub>3</sub> and NH<sub>3</sub> yield rate of foam copper in different electrolyte concentrations (Bars denote NH<sub>3</sub> FE, and lines denote NH<sub>3</sub> yield rate).

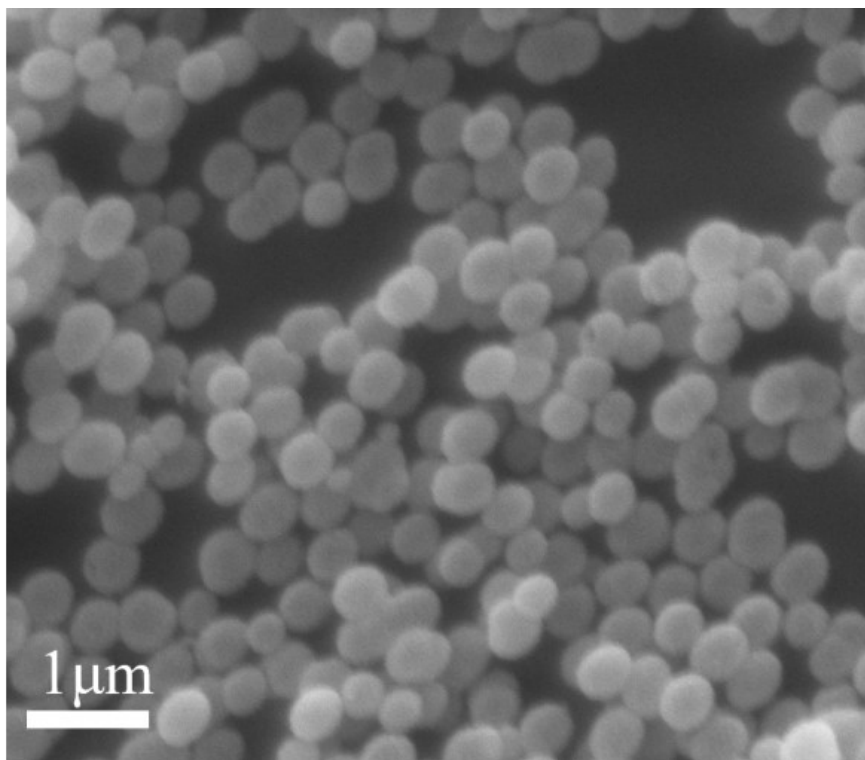

**Fig. S12** SEM image of the H-Co<sub>2</sub>Cu<sub>1</sub> hollow spheres after electrolysis.

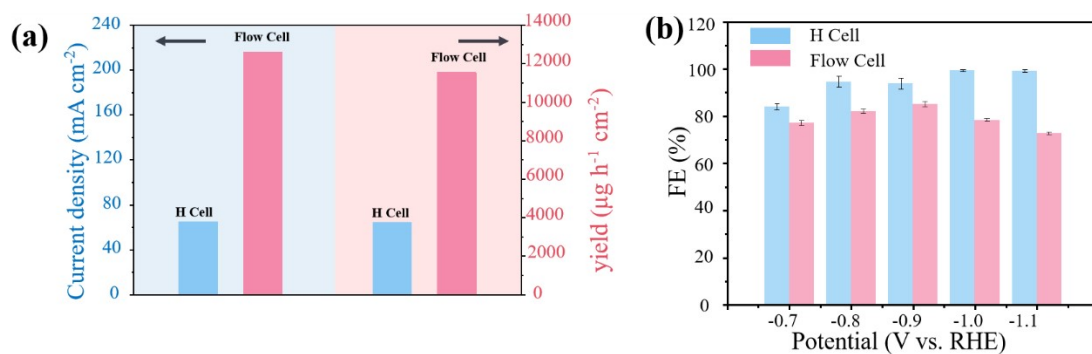

**Fig. S13** (a) Comparisons of the measured current densities and NH<sub>3</sub> yield rates measured in H-type cell and flow cell under the same reaction conditions (50 mM KNO<sub>3</sub> electrolyte, -1.0V vs RHE, 1 h reaction time). (b) Faradaic efficiency for NH<sub>3</sub> of H-Co<sub>2</sub>Cu<sub>1</sub> in conventional H-type cell and flow cell within 50 mM KNO<sub>3</sub> electrolyte.

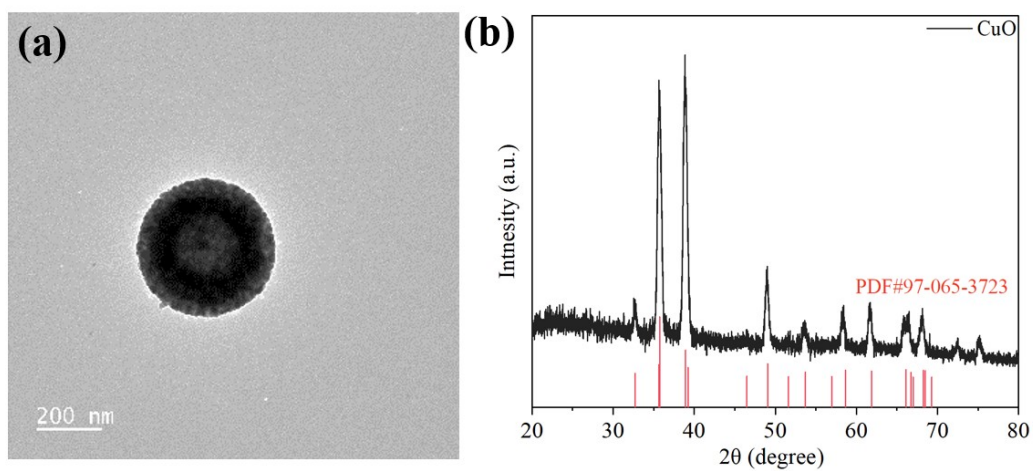

**Fig. S14** (a) a representative SEM image and (b) XRD of hollow CuO nanoparticles.

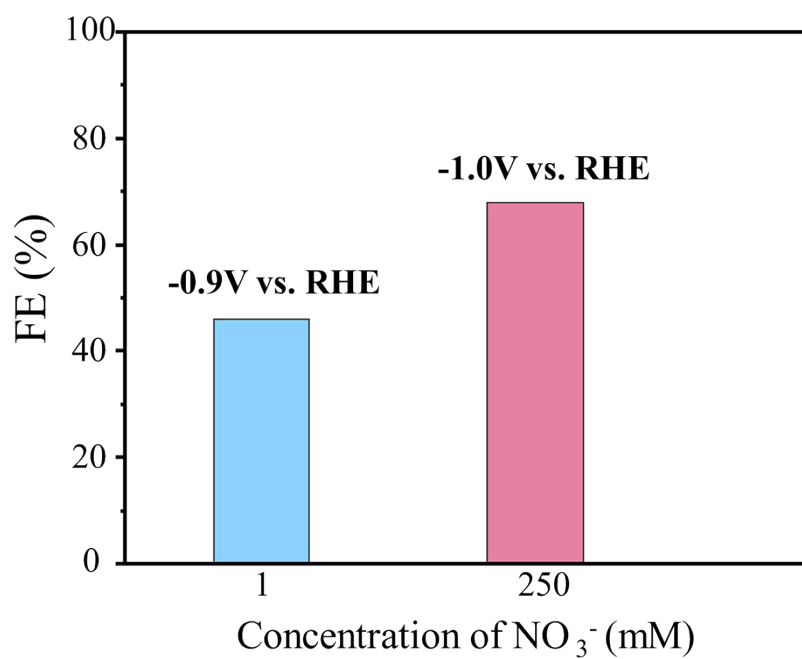

**Fig. S15**  $\text{NH}_3$  FE of hollow CuO catalysts in 1 mM and 250 mM nitrate concentrations.

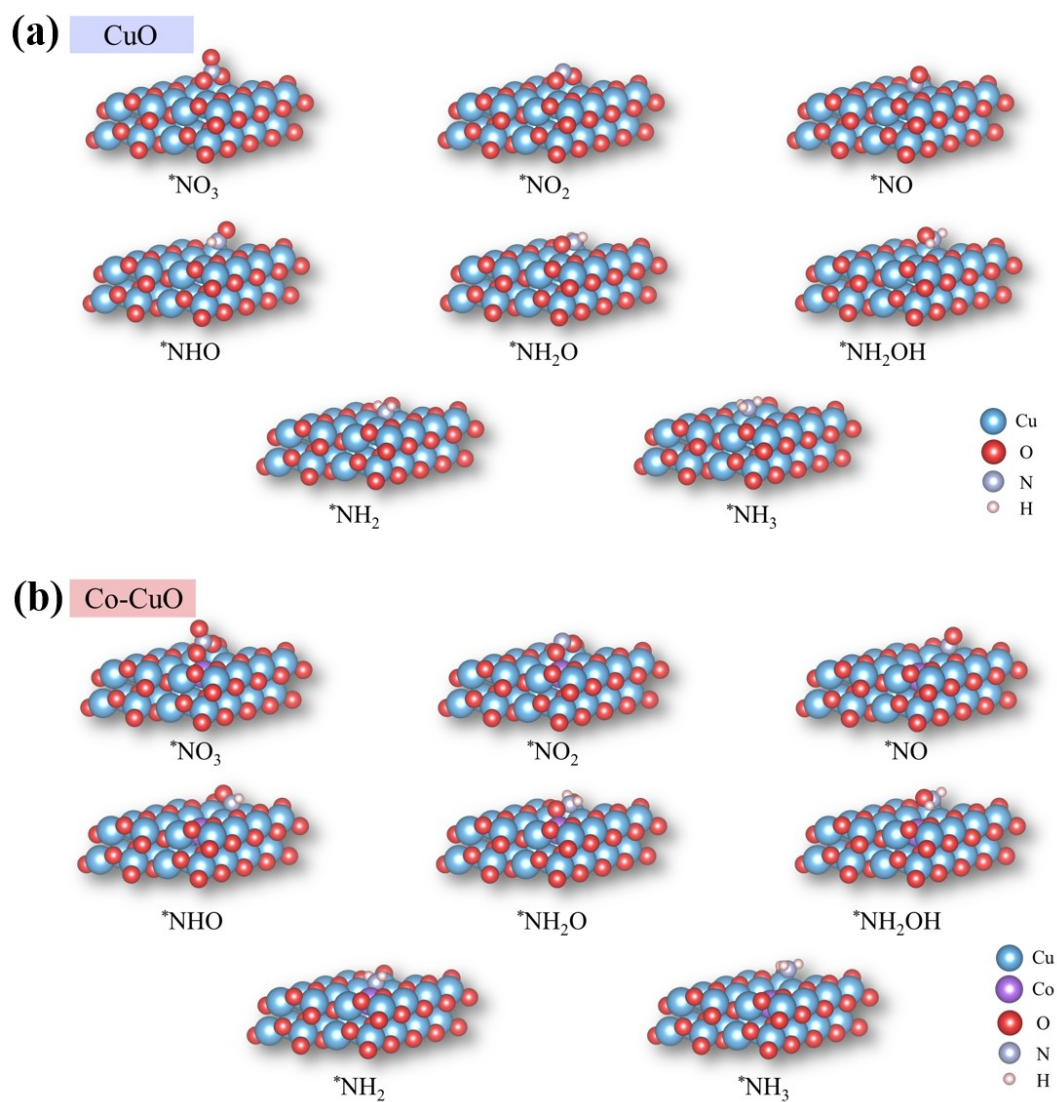

**Fig. S16** Corresponding structural models for the reaction pathways on (a) CuO and (b) Co-CuO models.

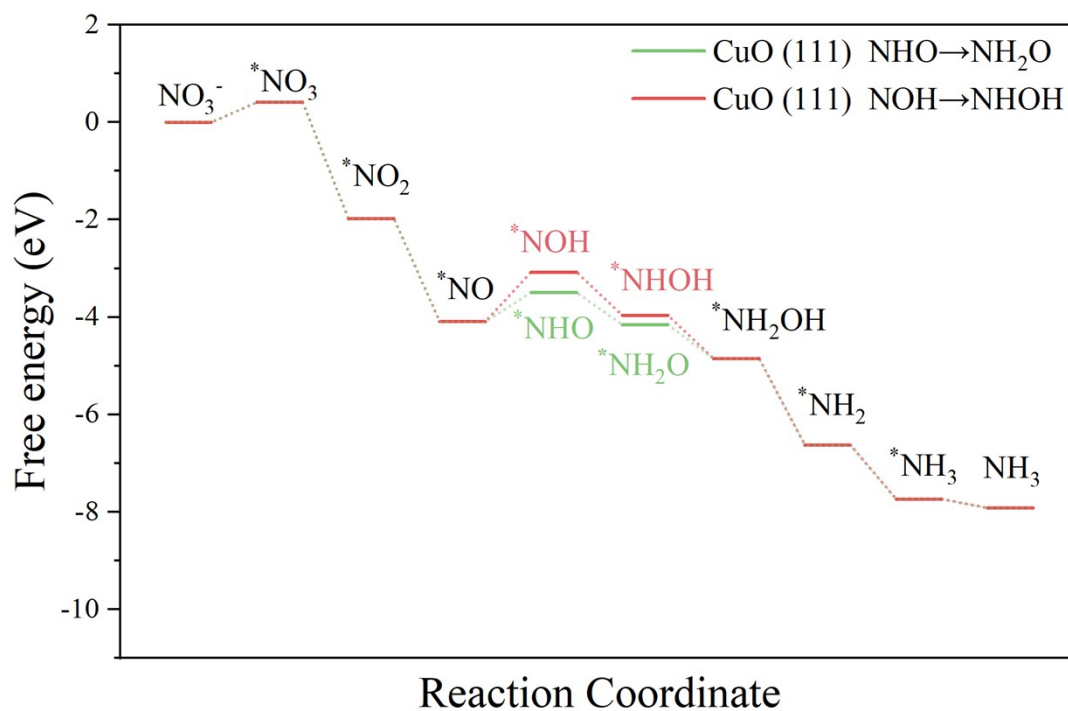

**Fig. S17** Calculated free energy profiles for eNRA on the CuO(111) surface. Two competing hydrogenation pathways from  $^*\text{NO}$  are compared: the  $^*\text{NOH} \rightarrow ^*\text{NHOH}$  route (red) and the  $^*\text{NHO} \rightarrow \text{NH}_2\text{O}$  route (green), indicating  $^*\text{NHO}/^*\text{NH}_2\text{O}$  is energetically more favorable on CuO(111), governing the subsequent reduction steps toward  $\text{NH}_3$ .

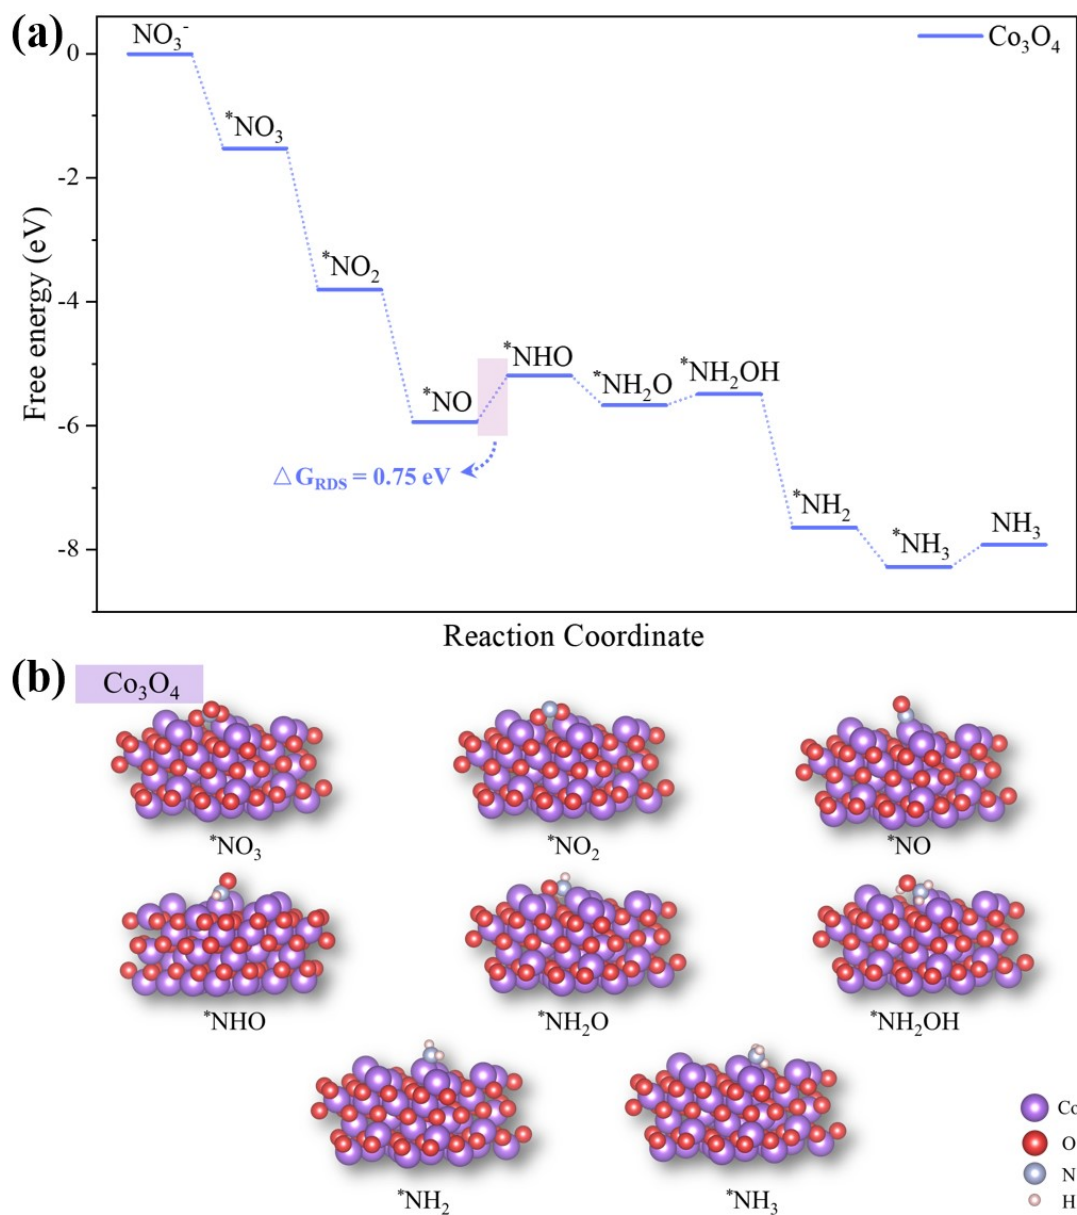

**Fig. S18** (a) Calculated free energy profiles for the reaction pathways on  $\text{Co}_3\text{O}_4$  (111) surface and (b) corresponding structural models.

**Table S1.** Cu/Co molar ratio of unsupported H-Co<sub>2</sub>Cu<sub>1</sub>, H-Co<sub>1</sub>Cu<sub>1</sub> and H-Co<sub>1</sub>Cu<sub>2</sub> measured by ICP-OES.

| Catalyst                          | Co<br>(mg/L) | Cu<br>(mg/L) | Co<br>(wt%) | Cu<br>(wt%) | Co:Cu<br>molar ratio |
|-----------------------------------|--------------|--------------|-------------|-------------|----------------------|
| H-Co <sub>2</sub> Cu <sub>1</sub> | 2.25         | 1.08         | 45.0        | 21.6        | 2.24:1               |
| H-Co <sub>1</sub> Cu <sub>1</sub> | 1.64         | 1.80         | 32.8        | 36.0        | 0.98:1               |
| H-Co <sub>1</sub> Cu <sub>2</sub> | 1.19         | 2.68         | 23.8        | 53.6        | 0.48:1               |

**Table S2.** Comparison of recently reported system energy consumption values.

| Energy consumption<br>(kWh kg <sup>-1</sup> NH <sub>3</sub> ) | REF       |
|---------------------------------------------------------------|-----------|
| 26.95                                                         | This work |
| 28.4                                                          | 3         |
| 17.0                                                          | 4         |
| 21.4                                                          | 5         |
| 21.19                                                         | 6         |
| 27.8                                                          | 7         |
| 23.0                                                          | 8         |
| 19.5                                                          | 9         |
| 16.3                                                          | 10        |
| 39.49                                                         | 11        |

**Table S3.** Comparison of eNRA performance of catalysts reported in neutral environment.

| Catalyst                                   | NO <sub>3</sub> <sup>-</sup> Electrolyte<br>(mM) | NH <sub>3</sub> yield<br>(μg·h <sup>-1</sup> cm <sup>-2</sup> ) | FE<br>(%) | REF  |
|--------------------------------------------|--------------------------------------------------|-----------------------------------------------------------------|-----------|------|
| H-Co <sub>2</sub> Cu <sub>1</sub>          | 1                                                | 74                                                              | 86        | This |
|                                            | 10                                               | 2107                                                            | 97        | work |
|                                            | 50                                               | 4809                                                            | 99.8      |      |
|                                            | 250                                              | 8959                                                            | 250       |      |
| CuX                                        | 3.6                                              | 1340                                                            | 80        | 12   |
| Cu <sub>2</sub> O/TiO <sub>2</sub> -x      | 3.6                                              | 3220                                                            | 98        | 13   |
| Cu-CoFe LDH-Ov5                            | 5                                                | 1615                                                            | 95.6      | 14   |
| Cu <sub>2</sub> O/Cu nanosheet             | 14                                               | 2793                                                            | 93.2      | 15   |
| r-Cu/Ga <sub>2</sub> O <sub>3</sub> -SAM20 | 20                                               | 16106                                                           | 95.48     | 16   |
| AuRu-Cu <sub>2</sub> O/CF                  | 35.7                                             | 10810                                                           | 90.99     | 17   |
| c-Co@a-Cu                                  | 50                                               | 4630                                                            | 99.6      | 18   |
| TTA-TPH-CuCo                               | 100                                              | 13490                                                           | 92.31     | 19   |
| Ni-CuO                                     | 100                                              | 15980                                                           | 95.26     | 20   |
| CoTMA                                      | 100                                              | 4513.5                                                          | 94.7      | 21   |
| ZIF-67@HMCS                                | 100                                              | 10200                                                           | 97.6      | 22   |
| Ca-Cu <sub>2</sub> O-OA                    | 100                                              | 15020                                                           | 97.49     | 23   |
| Cu <sub>1</sub> Co <sub>1</sub> HHTP       | 100                                              | 30200                                                           | 96.4      | 24   |
| i(TCNQ) <sub>2</sub> /NF NTs               | 200                                              | 11286.9                                                         | 83.7      | 25   |
| CoCu-NC                                    | 200                                              | 2450                                                            | 95.3      | 26   |
| CuCo-DHTA                                  | 500                                              | 13490                                                           | 91.58     | 27   |

## References

1. J. Zhou, F. Liu, Z. Xu, J.-A. Yin, L. Guo, F. Hao, Y. Wang, Y. Xiong, X. Zhou, C. Wang, Y. Ma, X. Meng, P. Lu, J. Yin, A. Zhang, J. Wang, C. Ye, Q. Li, C. Ling, H.-C. Chen, H. M. Chen, Y. Zhu, J. Lu and Z. Fan, *J. Am. Chem. Soc.*, 2025, **147**, 23226-23238.
2. S. Liang, X. Teng, H. Xu, L. Chen and J. Shi, *Angew. Chem. Int. Ed.*, 2024, **63**, e202400206.
3. M. Wang, W. Song, H. Zou, G. Liu and S. You, *Adv. Funct. Mater.*, 2026, **0**, e28731.
4. Y. Li, Y. Liu, M. Zhang, L. Li, Z. Jiang, B. Han, B. Wang and J. Li, *Angew. Chem. Int. Ed.*, 2025, **64**, e202417631.
5. Y. Li, L. Li, S. Xu, K. Cui, T. Wang, Z. Jiang and J. Li, *Angew. Chem. Int. Ed.*, 2024, **63**, e202407810.
6. T. G. Eshetu, M. E. Ayalew, A. A. Mitiku, Q.-N. Ha, M. Z. Silitonga, V.-N. Tran and D.-H. Kuo, *Chem. Eng. J.*, 2026, **527**, 171695.
7. Q. Li, Y. Li, B. Xu, J. Yang and Y. Wang, *Angew. Chem. Int. Ed.*, 2025, **64**, e202510139.
8. X. Ouyang, W. Qiao, Y. Yang, B. Xi, Y. Yu, Y. Wu, J. Fang, P. Li and S. Xiong, *Angew. Chem. Int. Ed.*, 2025, **64**, e202422585.
9. Y. Feng, X. Lv, H. Wang, L. Wang, M.-L. Sun, J.-T. Ren and Z.-Y. Yuan, *Adv. Energy Mater.*, 2025, **15**, e03022.
10. S. Zhang, Q. Song, X. Cui, G. Guo, J. Li, X. Liu and M. Li, *Appl. Catal. B: Environ. Energy*, 2026, **385**, 126297.
11. X. Xu, Y. Ge, C. Fu, R. Wang, C. Liu, Z. Yin, Q. Zhou and W. Yang, *J. Colloid Interface Sci.*, 2026, **706**, 139749.
12. L. Fang, Y. Wang, S. Lu, Y. Zhang, Y. Li, F. Yin and H. Liu, *Appl. Catal. B: Environ. Energy*, 2025, **381**, 125816.
13. Q. Song, W. Dong, J. Wang, S. Zhang, M. Li, J. Chen, S. Zhang and J. Lu, *Chem. Eng. J.*, 2025, **520**, 165364.
14. X. Fan, C. Lai, L. Qin, M. Zhang, H. Yan, S. Liu, D. Ma, Q. Liu and L. Tang, *Chem. Eng. J.*, 2025, **522**, 168046.
15. X. Liu, Y. Wang, Z. Hu, B. Yang, R. L. Smith Jr, Y. Su and X. Qi, *Appl. Catal. B: Environ. Energy*, 2025, **371**, 125254.
16. B. Liu, H. Liu, S. Qiang, J. Dai, J. Yan, J. Yu, Y. T. Liu and B. Ding, *Adv. Funct. Mater.*, 2026, **0**, e29295.
17. K. Li, B. An, J. Zhu, X. Yu, B. Wang, S. Sun, F. Li, Y. Tang, Z. Li and K. Zhao, *Chem. Eng. J.*, 2025, **520**, 166141.
18. J. Wei, Y. Liu, Z. Wu, L. Han, A. Deng, Q. Li, C. Jiang, J. Liu, L. Gan and Y. Zhang, *Adv. Funct. Mater.*, 2025, **35**, e13566.
19. J. Zhong, H. Duan, M. Cai, Y. Zhu, Z. Wang, X. Li, Z. Zhang, W. Qu, K. Zhang and D. Han, *Angew. Chem. Int. Ed.*, 2025, **64**, e202507956.
20. Y. Li, J. Wei, H. Lin, Y. Guo, X. Lu, S. Liu, H. Liu, M. Tang, J. Zhou and Y.-y. Li, *ACS Catal.*, 2025, **15**, 1672-1683.

21. H. Sun, W. Zhang, Y. Qi, Q. Xu, J. Han, R. Zhao, Y. Liu, J.-S. Qin and H. Rao, *ACS Catal.*, 2025, **15**, 18712-18722.
22. Q. Tian, X. Ye, L. Jing, W. Wang, Z. Zheng, A. Li, K. Xie, X. Huang, Q. Hu and H. Yang, *Angew. Chem. Int. Ed.*, 2025, **137**, e202516919.
23. Y. Wang, T. Bao, L. Chen, C. Zhang, J. Wang, Y. Zou, Y. Xi, Z. Li, C. Yu and C. Liu, *Angew. Chem. Int. Ed.*, 2025, **64**, e202509090.
24. P. Liu, J. Yan, H. Huang and W. Song, *Chem. Eng. J.*, 2023, **466**, 143134.
25. N. Mukherjee, A. Adalder, S. Paul, N. Barman, R. Thapa, K. Mitra, R. Urkude and U. K. Ghorai, *Adv. Funct. Mater.*, 2025, **36**, e19797.
26. J. Wei, H. Lin, Y. Li, Y. Guo, S. Liu, M. Sun and Y.-y. Li, *J. Hazard. Mater.*, 2025, **493**, 138264.
27. A. Yan, Y. Feng, X. Zhang, J. Sun, J. Wei, C. Shi, L. Xia, S. Wang, H. Zhang and Y. Guo, *Small*, 2025, **21**, e06256.
